# Supplementary material
Source: publisher figshare collection journal article supplement (https://acs.figshare.com/ndownloader/files/12728009)
Supplement: Supplementary file 1 [file 12728009]

# Supporting Information

## Spontaneous Registration of Sub-10 Nanometer Features Based on Sub-Zero-Celsius Spin-Casting of Self-Assembling Building Blocks Directed by Chemically-Encoded Surfaces

Jung Hye Lee,<sup>1,†</sup> Hak-Jong Choi,<sup>2,†,‡</sup> ChulHee Lee,<sup>1</sup> Seung Won Song,<sup>1</sup> Joong Bum Lee,<sup>1</sup>

Daihong Huh,<sup>2</sup> Yoon Sung Nam,<sup>1</sup> Duk Young Jeon,<sup>1</sup> Heon Lee,<sup>2,\*</sup> and Yeon Sik Jung<sup>1,\*</sup>

<sup>1</sup>Dept. of Materials Science and Engineering, Korea Advanced Institute of Science and Technology (KAIST), 291 Daehak-ro, Yuseong-gu, Daejeon 34141, Republic of Korea

<sup>2</sup>Department of Materials Science and Engineering, Korea University, 145 Anam-ro, Seongbuk-gu, Seoul, 02841, Republic of Korea

Present Address of Dr. H.-J. Choi

<sup>‡</sup>University of Pennsylvania, Dept. of Electrical and Systems Engineering, 200 South 33rd street, Philadelphia, PA, USA, 19104

**Table S1. Vapor pressure data of solvents depending on temperature**

|                | Vapor pressure (mmHg) |         |        |        |        |        |        |
|----------------|-----------------------|---------|--------|--------|--------|--------|--------|
|                | @ -15℃                | @ -5℃   | @ 5℃   | @ 15℃  | @ 25℃  | @ 35℃  | @ 45℃  |
| <b>Heptane</b> | 4.0822                | 8.0520  | 14.958 | 26.372 | 44.406 | 71.799 | 111.98 |
| <b>Toluene</b> | 2.4747                | 4.9160  | 9.2137 | 16.408 | 27.935 | 45.693 | 72.122 |
| <b>PGMEA</b>   | 0.19191               | 0.48902 | 1.1335 | 2.4230 | 4.8303 | 9.0628 | 16.126 |

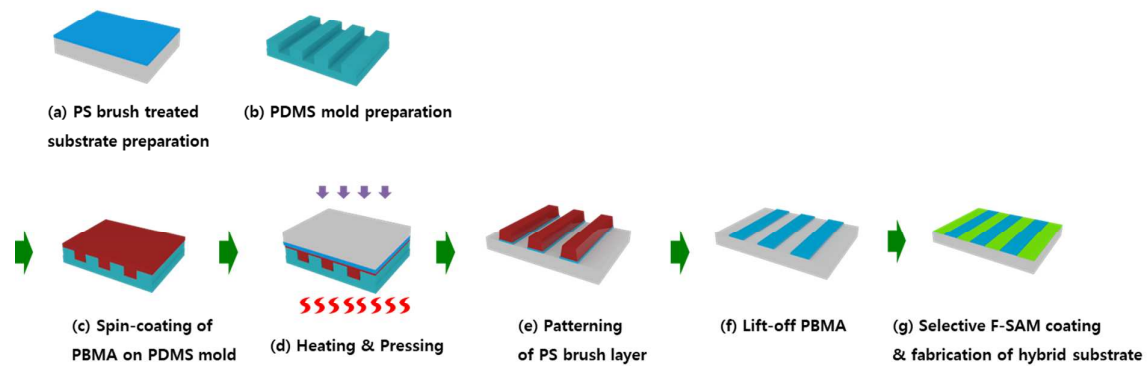

**Figure S1.** Process flow of SAM patterning *via* transfer printing and reactive ion etching.

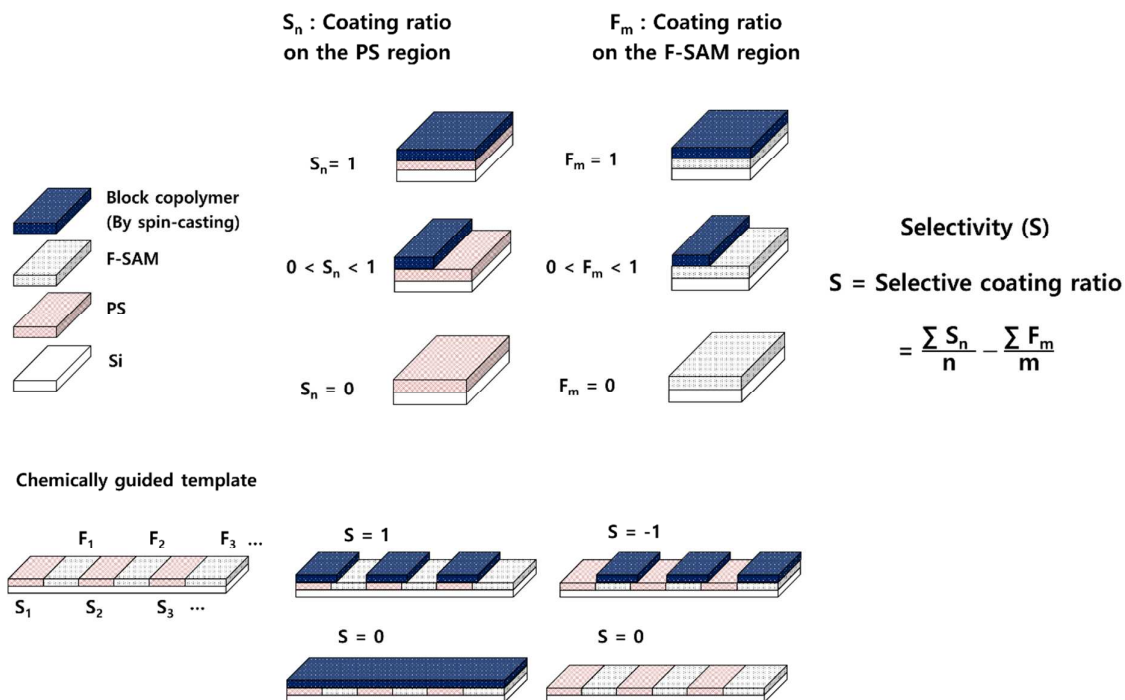

**Figure S2.** Definition of selectivity of spun-cast thin film on the patterned SAM substrate.

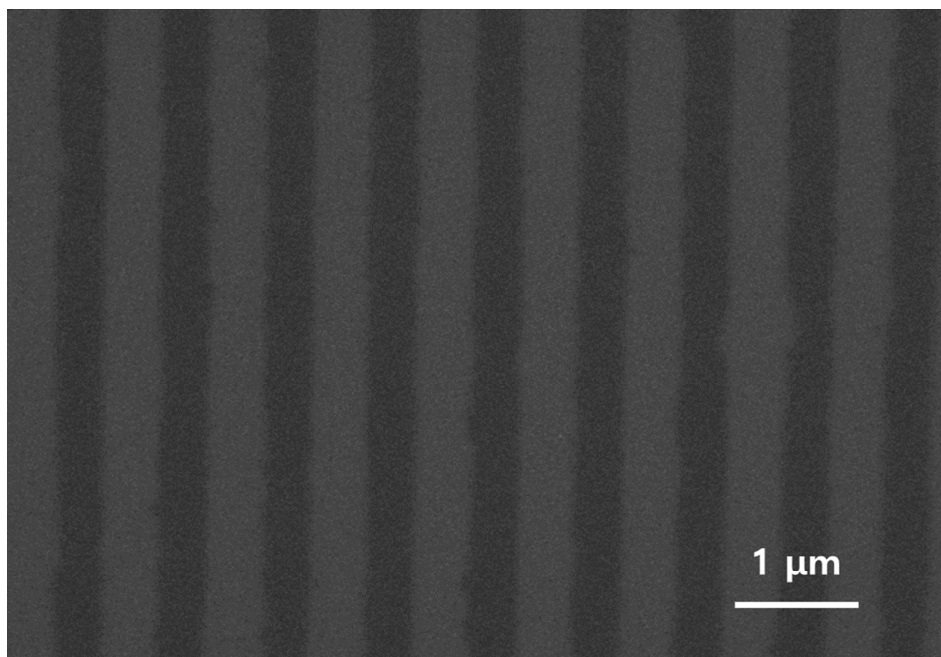

**Figure S3.** BCP thin films patterned with S-CSC at -5°C.

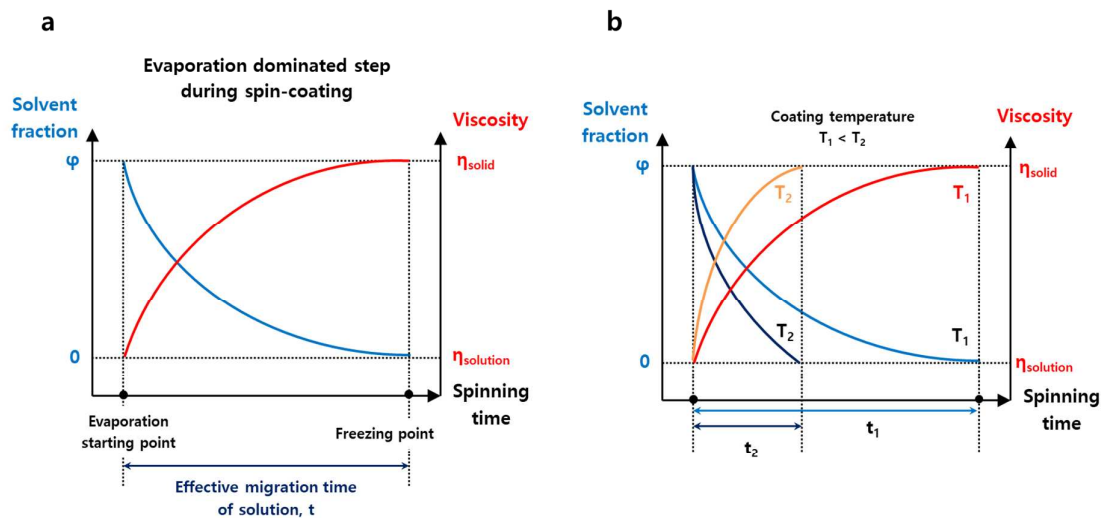

**Figure S4.** Illustration of effective migration time of solution depending on spin-casting temperature. (a) Effective migration time is defined as the time before the saturation of viscosity with evaporation of solvent during spin coating. (b) Lower spin-casting temperature allows a longer migration time.

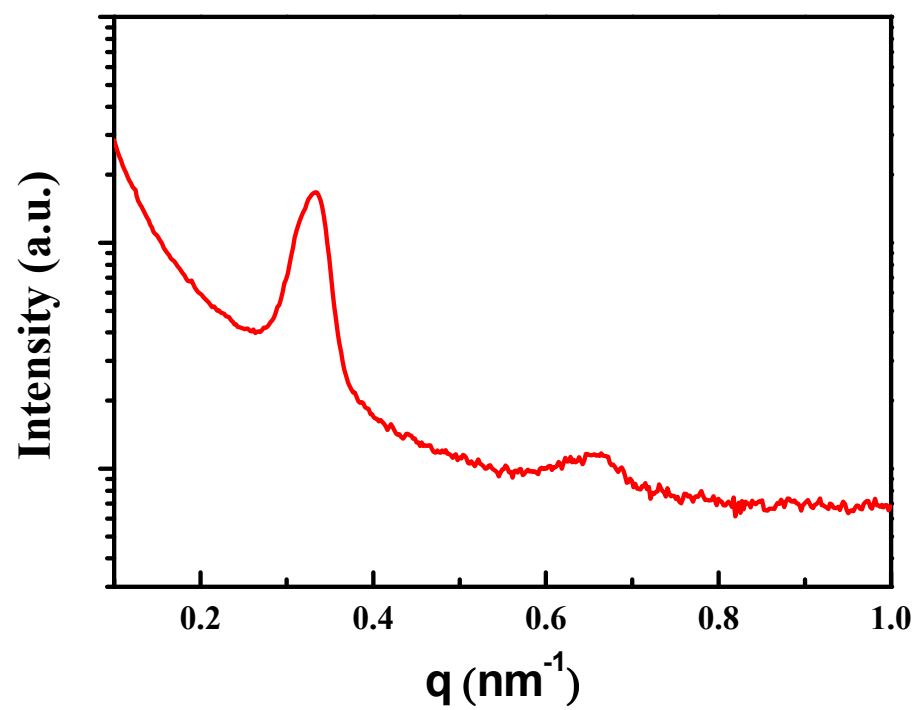

**Figure S5.** GISAXS data of the patterned BCP obtained with S-CSC at -5°C.

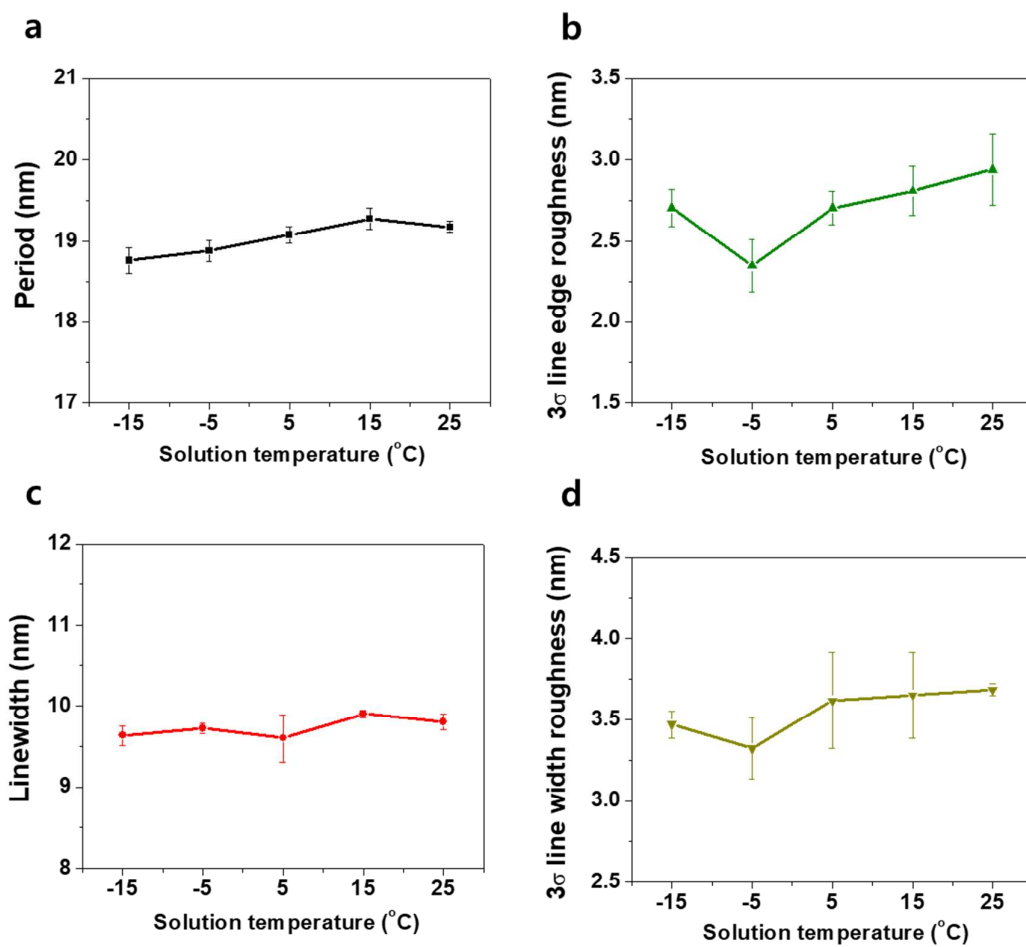

**Figure S6.** Pattern quality analysis of BCP patterns obtained from S-CSC, thermal annealing, and reactive ion etching.



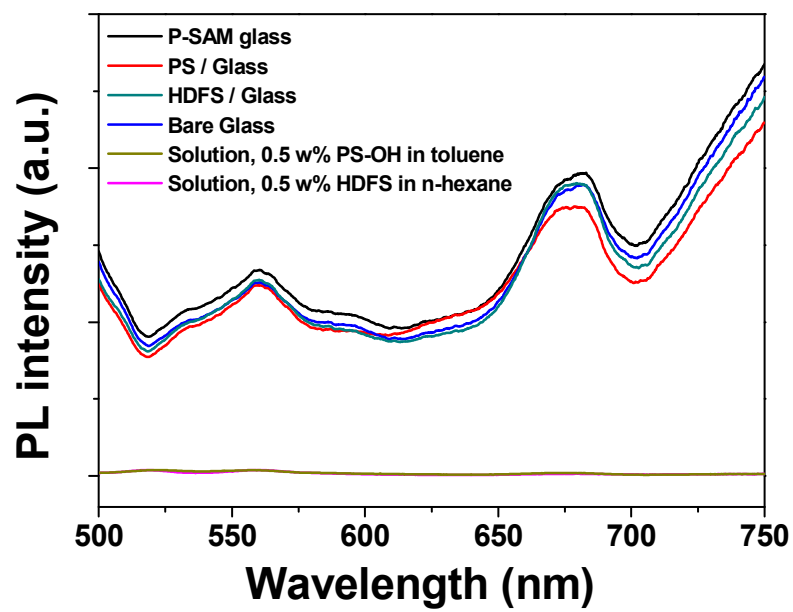

**Figure S7.** PL intensity profiles of the SAM patterns on glass substrate.

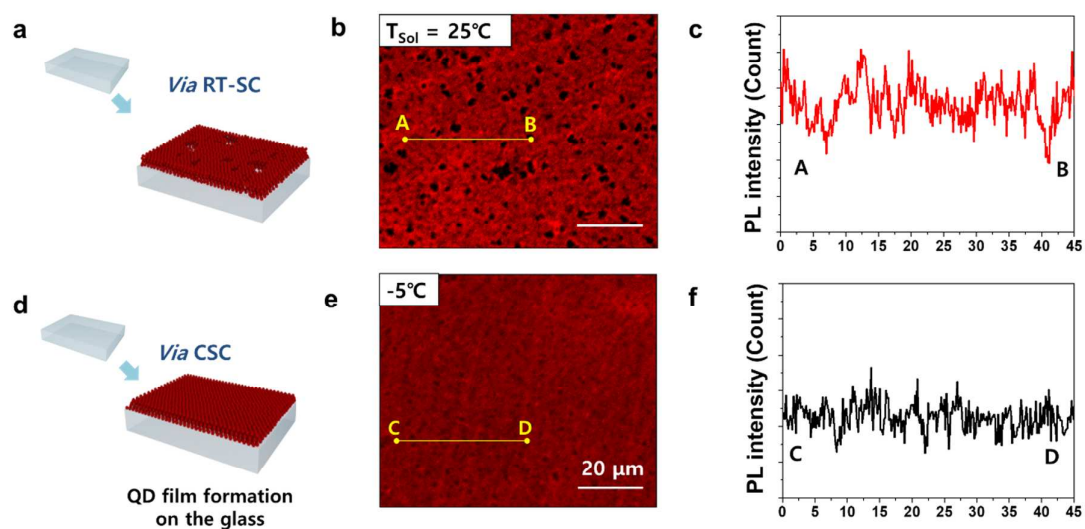

**Figure S8.** Fluorescence characteristics of CdSe QD on non-patterned glass substrate. (a), (b), and (c) RT cast at 25°C and (d), (e), and (f) CSC at -5°C. (a) & (d) illustrations, (b) & (e) confocal microscopy images, and (c) & (f) emission intensity profiles.

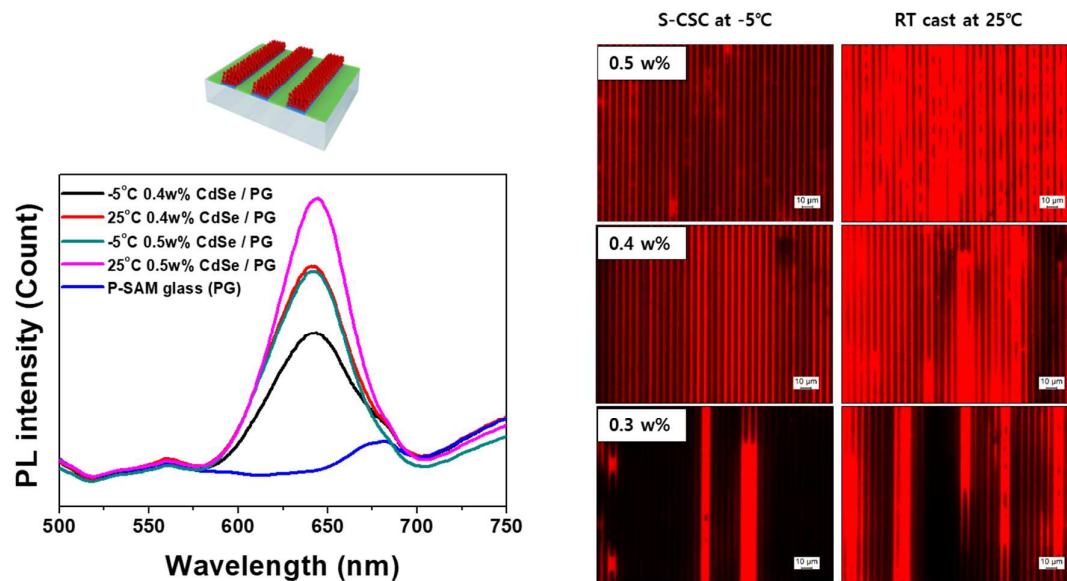

**Figure S9.** Fluorescence microscopy images and PL intensity of CdSe QD patterns depending on spin-casting temperature and QD concentration (from 0.5 to 0.3 w% in toluene).
